# Supplementary material for: Morphological and Molecular Identification of Ulva spp. (Ulvophyceae; Chlorophyta) from Algarrobo Bay, Chile: Understanding the Composition of Green Tides
Source: MDPI journal article supplement (doi:10.3390/plants13091258), 2024-04-30
Supplement: s1 [file s1]

**Figure S1.** Voucher specimens of *Ulva* spp. collected from Los Tubos beach, Algarrobo Bay, Chile, housed at the National Museum of the Natural History, Chile SGO 171635 – 171651.

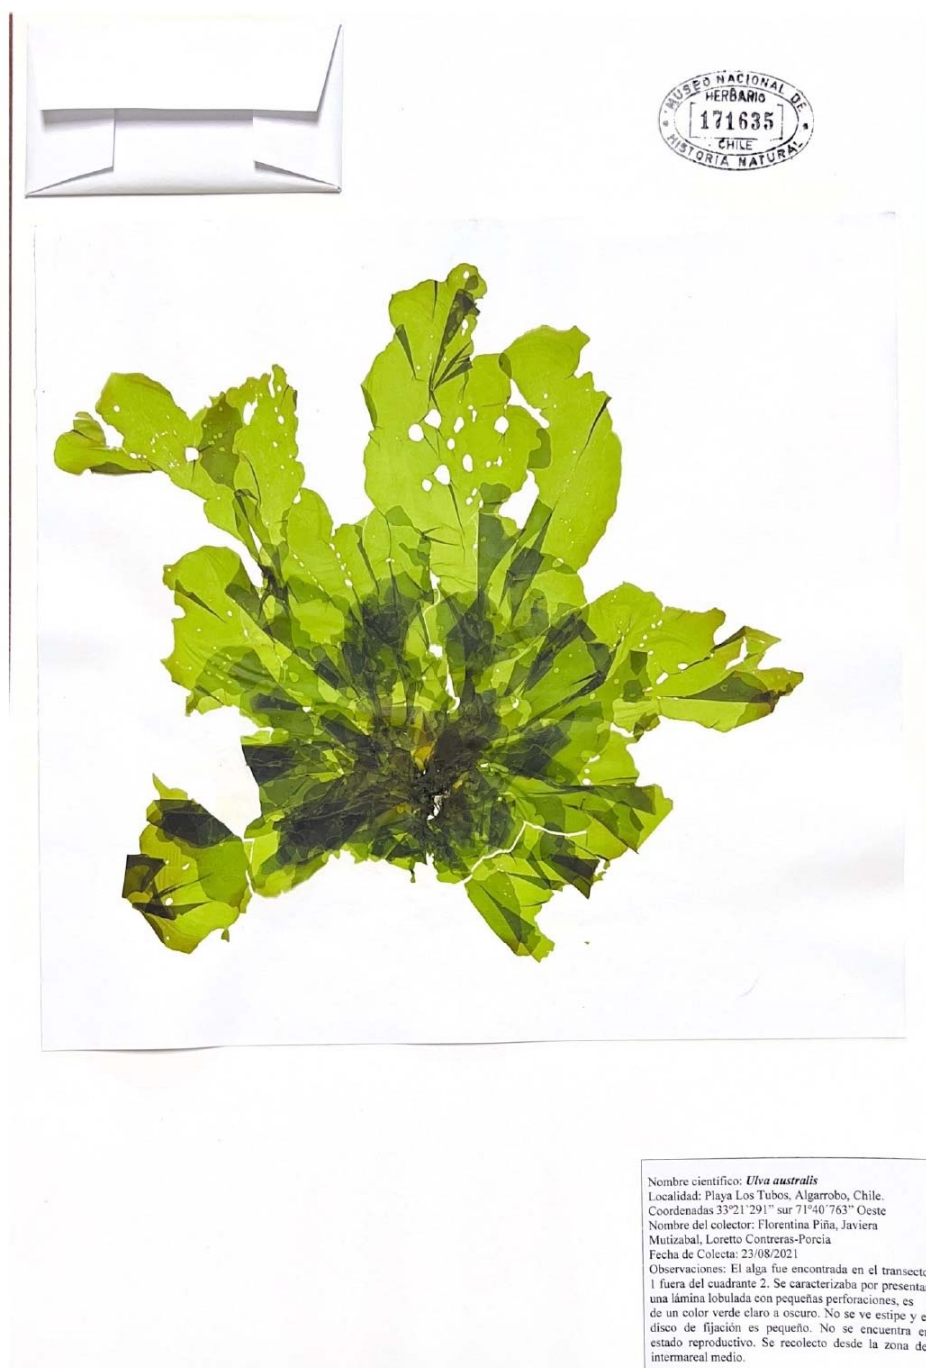

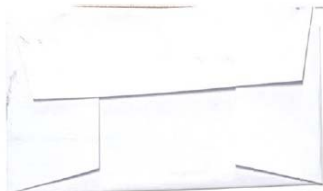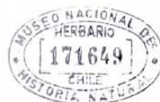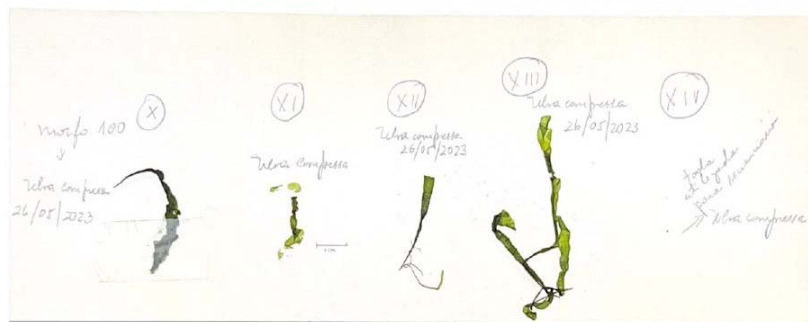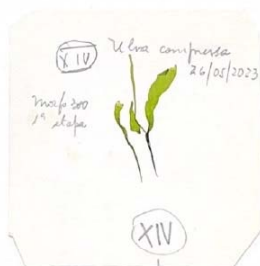

Nombre científico: *Uva compressa*  
Localidad: Playa Los Tubos, Algarrobo, V Región, Chile.  
Coordenadas 33°21'891" sur 71°40'763" Oeste  
Nombre del colector: Javiera Mutizabal, Alejandra Núñez y Loretto Contreras-Porcia  
Fecha de Colecta: 11/03/2022  
Observaciones: El alga fue encontrada en el sector su de la playa de Los Tubos (X-XIV); se caracterizan por presentar un talo tubular de color verde claro, delgado y suave al tacto, que se va engrosando hacia la parte superior. Se adhiere al sustrato mediante un disco muy pequeño de forma redonda.  
En su fronda se acumulan pequeños granos de arena.  
Hábitat: se encuentra principalmente en el intermareal medio-alto en pozas con fondo arenoso.  
Estado reproductivo: no se observa estructuras, por lo que se encuentra en una etapa vegetativa.

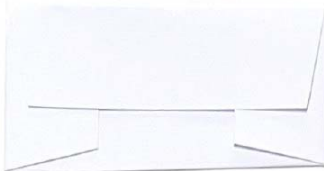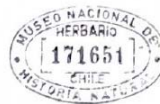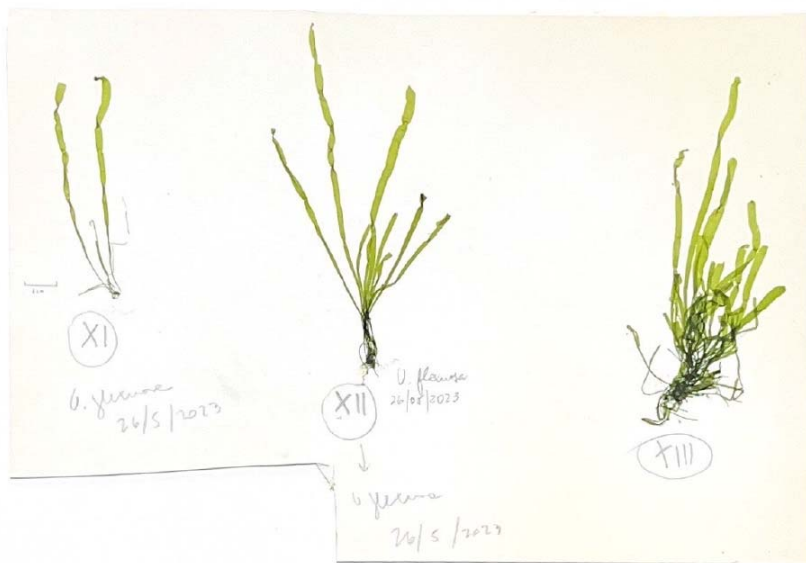

Nombre científico: *Ulva flexuosa*  
Localidad: Playa Los Tubos, Algarrobo, V Región, Chile.  
Coordenadas 33°21' 891" sur 71°40' 763" Oeste  
Nombre del colector: Javiera Mutizabal, Alejandra Núñez y Loretto Contreras-Porcia  
Fecha de Colecta: 11/03/2022  
Observaciones: El alga fue encontrada en el sector su de la playa de Los Tubos (X-XIV); se caracterizan por presentar un talo tubular de color verde claro, delgado, manteniendo su grosor desde el disco hasta la zona apical y en algunos casos ligeramente más ancho hacia la zona apical. El disco de fijación es pequeño, redondo de forma irregular.  
Hábitat: se encuentra principalmente en el intermareal medio-alto en pozas con fondo arenoso.  
Estado reproductivo: no se observa estructuras, por lo que se encuentra en una etapa vegetativa.

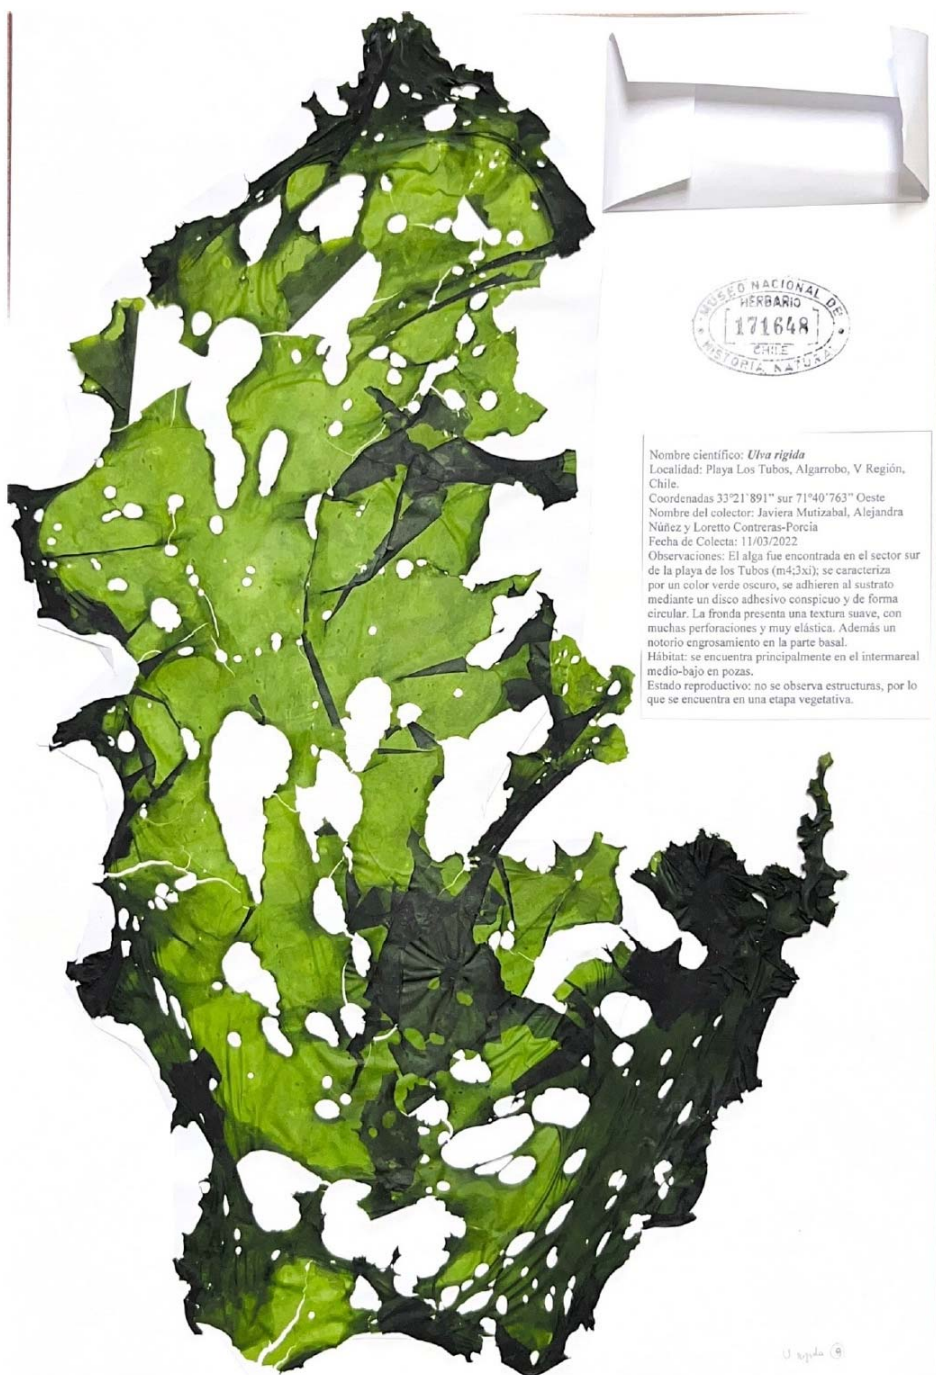

Nombre científico: *Ulva rigida*  
Localidad: Playa Los Tubos, Algarrobo, V Región, Chile.  
Coordenadas 33°21'891" sur 71°40'763" Oeste  
Nombre del colector: Javier Mutizabal, Alejandra Núñez y Loretto Contreras-Porcia  
Fecha de Colecta: 11/03/2022  
Observaciones: El alga fue encontrada en el sector sur de la playa de los Tubos (m-423xi); se caracteriza por un color verde oscuro, se adhieren al sustrato mediante un disco adhesivo conspicuo y de forma circular. La fronda presenta una textura suave, con muchas perforaciones y muy elástica. Además un notorio engrosamiento en la parte basal.  
Habitat: se encuentra principalmente en el intermareal medio-bajo en pozas.  
Estado reproductivo: no se observa estructuras, por lo que se encuentra en una etapa vegetativa.

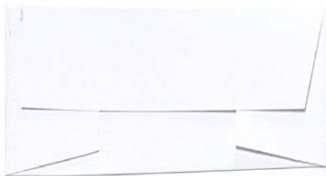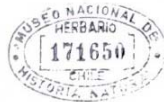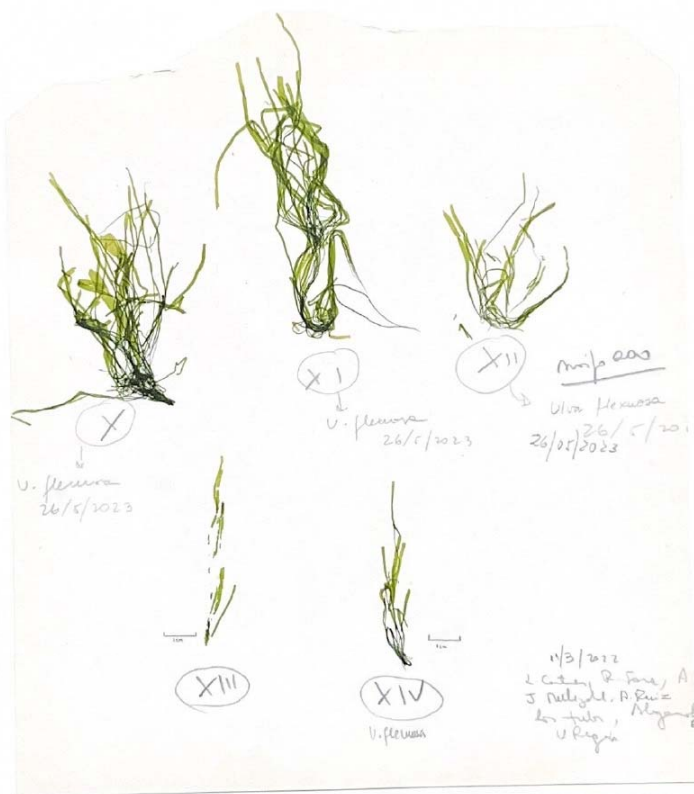

Nombre científico: *Ulva flexuosa*

Localidad: Playa Los Tubos, Algarrobo, V Región, Chile.

Coordenadas 33°21'59" sur 71°40'763" Oeste

Nombre del colector: Javiera Mutizabal, Alejandra

Núñez y Loretto Contreras-Porcia

Fecha de Colecta: 11/03/2022

Observaciones: El alga fue encontrada en el sector su de la playa de Los Tubos (X-XIV); se caracterizan por presentar un talo tubular de color verde claro, delgado, manteniendo su grosor desde el disco hasta la zona apical y en algunos casos ligeramente más ancho hacia la zona apical. El disco de fijación es pequeño, redondo de forma irregular.

Habitat: se encuentra principalmente en el intermareal medio-alto en pozas con fondo arenoso.

Estado reproductivo: no se observa estructuras, por lo que se encuentra en una etapa vegetativa.



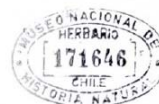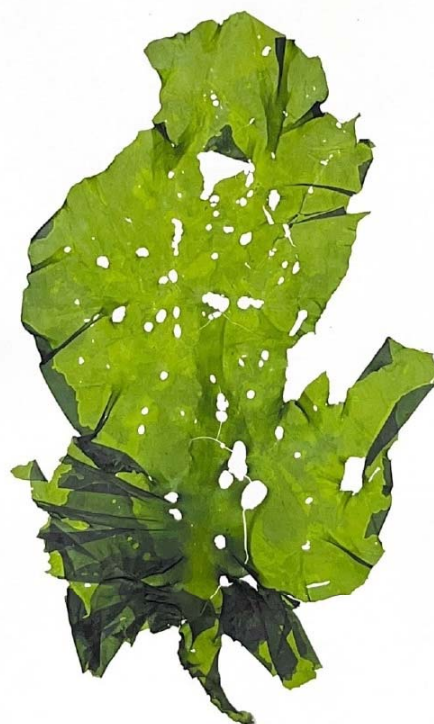

Nombre científico: *Ulva rigida*  
Localidad: Playa Los Tubos, Algarrobo, V Región, Chile.  
Coordenadas 33°21' 891" sur 71°40' 763" Oeste  
Nombre del colector: Javiera Mutizabal, Alejandra Núñez y Loretto Contreras-Porcia  
Fecha de Colecta: 11/03/2022  
Observaciones: El alga fue encontrada en el sector sur de la playa de los Tubos (m1-Fcm); se caracteriza por un color verde oscuro, se adhieren al sustrato mediante un disco adhesivo conspicuo y de forma circular. La fronda presenta una textura suave, con perforaciones y muy elástica. Además un notorio engrosamiento en la parte basal.  
Habitat: se encuentra principalmente en el intermareal medio-bajo en pozas.  
Estado reproductivo: no se observa estructuras, por lo que se encuentra en una etapa vegetativa.

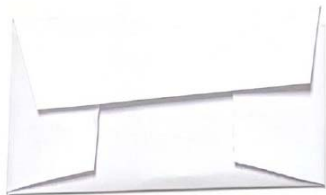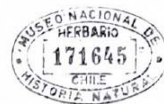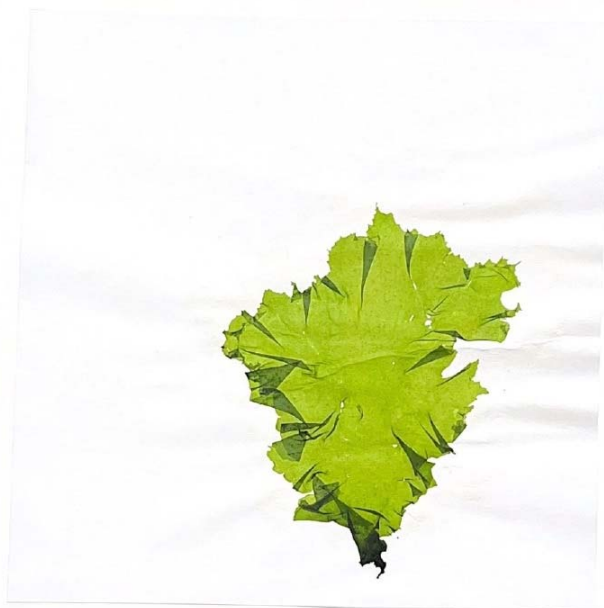

Nombre científico: *Ulva rigida*  
Localidad: Playa Los Tubos, Algarrobo, V Región, Chile.  
Coordenadas 33°21'891" sur 71°40'763" Oeste  
Nombre del colector: Javiera Mufizabal, Alejandra Nufiez y Loretto Contreras-Porcia  
Fecha de Colecta: 11/03/2022  
Observaciones: El alga fue encontrada en el sector sur de la playa de los Tubos (m2-XI); se caracteriza por un color verde oscuro, se adhieren al sustrato mediante un disco adhesivo conspicuo y de forma circular. La fronda presenta una textura suave, con perforaciones y muy elástica. Además un notorio engrosamiento en la parte basal.  
Habitat: se encuentra principalmente en el intermareal medio-bajo en pozas.  
Estado reproductivo: no se observa estructuras, por lo que se encuentra en una etapa vegetativa.

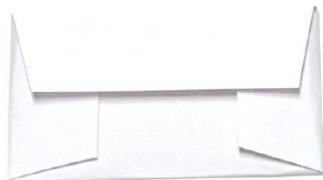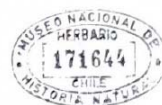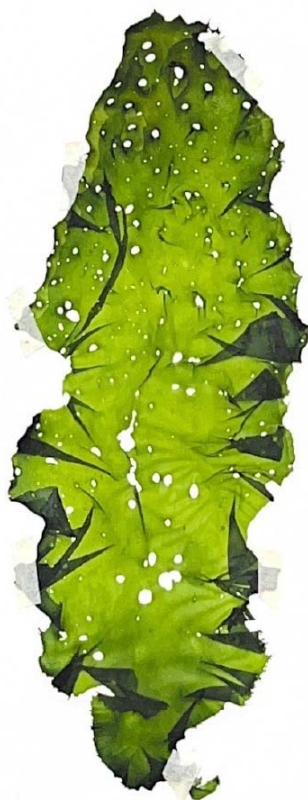

Nombre científico: *Ulva rigida*  
Localidad : Playa Los Tubos, Algarrobo, V Región,  
Chile.  
Coordenadas 33°21' 891" sur 71°40' 763" Oeste  
Nombre del colector: Javier Mutizabal, Alejandra  
Núñez y Loretto Contreras-Porcía  
Fecha de Colecta: 11/03/2022  
Observaciones: El alga fue encontrada en el sector sur  
de la playa de los Tubos (m3-XII); se caracteriza  
por un color verde oscuro, se adhieren al sustrato  
mediante un disco adhesivo conspicuo y de forma  
circular. La fronda presenta una textura suave, con  
perforaciones y muy elástica. Además un notorio  
engrosamiento en la parte basal.  
Hábitat: se encuentra principalmente en el intermareal  
medio-bajo en pozas.  
Estado reproductivo: no se observa estructuras, por lo  
que se encuentra en una etapa vegetativa.



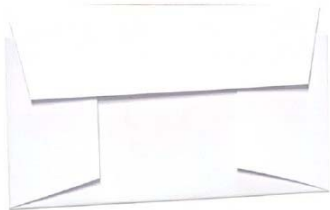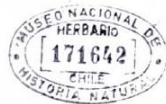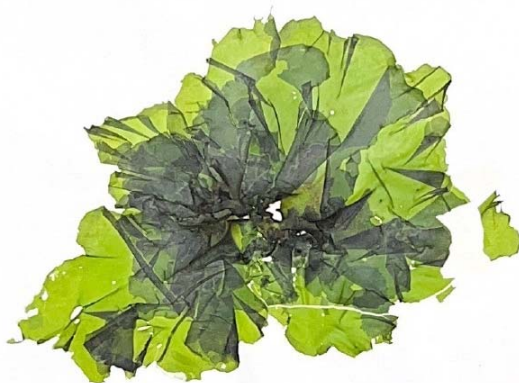

Nombre científico: *Ulva rigida*

Localidad: Playa Los Tubos, Algarrobo, V Región, Chile.

Coordenadas 33°21'891" sur 71°40'763" Oeste

Nombre del colector: Javiera Mutizabal, Alejandra Núñez y Loretto Contreras-Porcía

Fecha de Colecta: 11/03/2022

Observaciones: El alga fue encontrada fuera del transecto Fe1 del sector sur de la playa de los Tubos; se caracteriza por un color verde oscuro, se adhieren al sustrato mediante un disco adhesivo conspicuo y de forma circular. La fronda presenta una textura suave, con perforaciones y muy elástica. Además un notorio engrosamiento en la parte basal.

Habitat: se encuentra principalmente en el intermareal medio-bajo en pozas.

Estado reproductivo: no se observa estructuras, por lo que se encuentra en una etapa vegetativa.

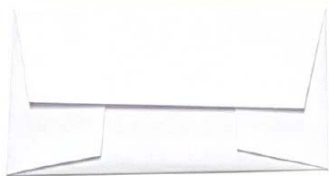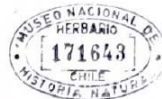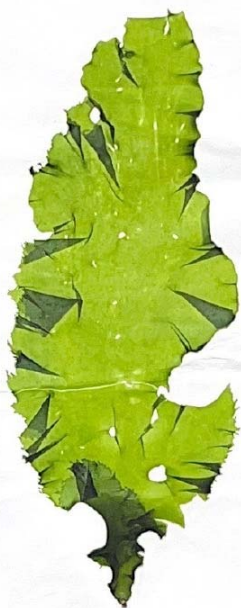

Nombre científico: *Ulva rigida*  
Localidad: Playa Los Tubos, Algarrobo, V Región, Chile.  
Coordenadas 33°21' 891" sur 71°40' 763" Oeste  
Nombre del colector: Javier Mutizabal, Alejandra Núñez y Loreto Contreras-Porcia  
Fecha de Colecta: 11/03/2022  
Observaciones: El alga fue encontrada en el sector sur de la playa de los Tubos (m2-X), se caracteriza por un color verde oscuro, se adhieren al sustrato mediante un disco adhesivo conspicuo y de forma circular. La fronda presenta una textura suave, con perforaciones y muy elástica. Además un notorio engrosamiento en la parte basal.  
Hábitat: se encuentra principalmente en el intermareal medio alto en pozas con sustrato rocoso.  
Estado reproductivo: no se observa estructuras, por lo que se encuentra en una etapa vegetativa.

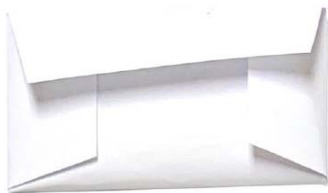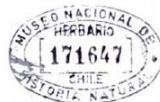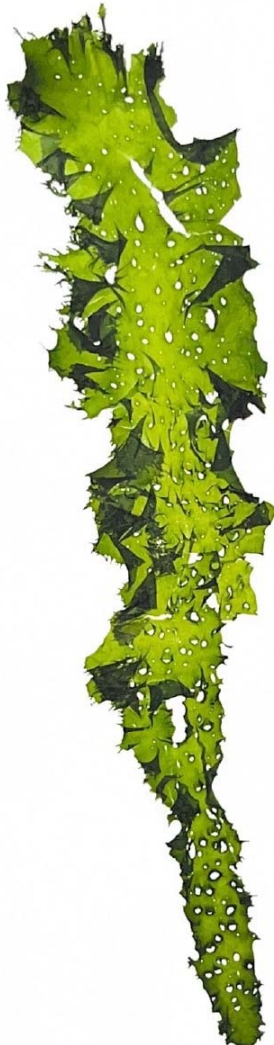

Nombre científico: *Ulva rigida*  
Localidad: Playa Los Tubos, Algarrobo, V Región, Chile.  
Coordenadas 33°21'891" sur 71°40'763" Oeste  
Nombre del colector: Javier Mutizabal, Alejandra Núñez y Loretto Contreras-Porcia  
Fecha de Colecta: 11/03/2022  
Observaciones: El alga fue encontrada en el sector sur de la playa de los Tubos (m4;3x); se caracteriza por un color verde oscuro, se adhieren al sustrato mediante un disco adhesivo conspicuo y de forma circular. La fronda presenta una textura suave, con pequeñas perforaciones y muy elástica. Además un notorio engrosamiento en la parte basal. También se puede observar pequeñas  
Habitat: se encuentra principalmente en el intermareal medio-bajo en pozas.  
Estado reproductivo: no se observa estructuras, por lo que se encuentra en una etapa vegetativa.

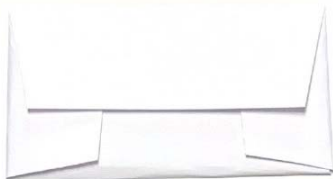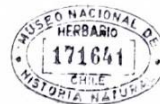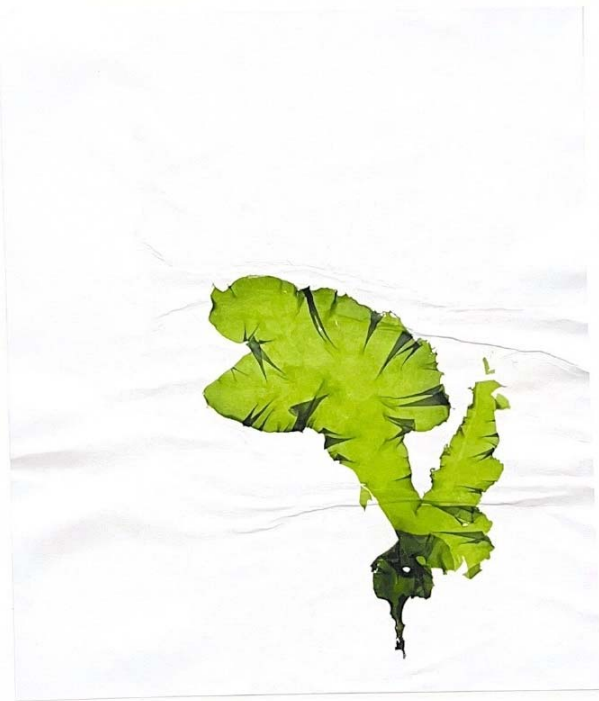

Nombre científico: *Ulva rigida*  
Localidad: Playa Los Tubos, Algarrobo, V Región Chile.  
Coordenadas 33°21'891" sur 71°40'763" Oeste  
Nombre del colector: Javiera Mutizabal, Loretto Contreras-Porcia y Alejandra Núñez.  
Fecha de Colecta: 23/08/2021  
Observaciones: El alga fue encontrada en el sector sur de la playa de los Tubos (m.l.-x); se caracteriza por un color verde oscuro, se adhieren al sustrato mediante un disco adhesivo conspicuo y de forma circular. La fronda presenta una textura suave, con perforaciones y muy elástica. Además un notorio engrosamiento en la parte basal.  
Habitat: se encuentra principalmente en el intermareal medio-bajo en pozas.  
Estado reproductivo: no se observa estructuras, por lo que se encuentra en una etapa vegetativa.

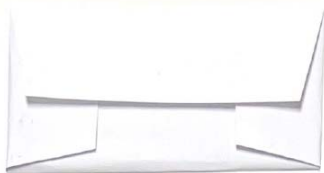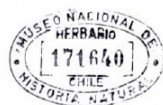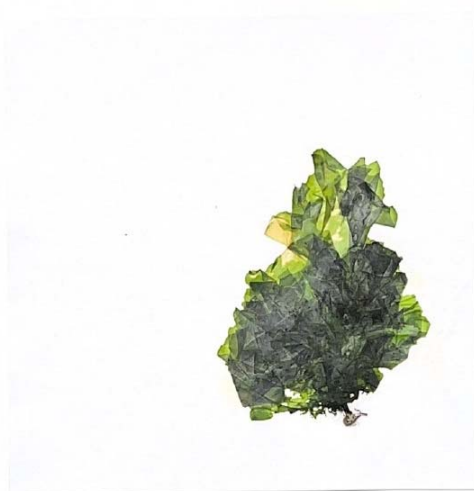

Nombre científico: *Ulva rigida*  
Localidad: Playa Los Tubos, Algarrobo, V Región, Chile.  
Coordenadas 33°21'891" sur 71°40'763" Oeste  
Nombre del colector: Javiera Mutizabal, Florentina Piña y Loretto Contreras-Porcia  
Fecha de Colecta: 11/03/2022  
Observaciones: El alga fue encontrada en el cuadrante 52 transecto 1, sector sur de la playa de los Tubos; se caracteriza por un color verde oscuro, se adhieren al sustrato mediante un disco adhesivo conspicuo y de forma circular. La fronda presenta una textura suave, con perforaciones y muy elástica. Además un notorio engrosamiento en la parte basal.  
Habitat: se encuentra principalmente en el intermareal medio-bajo en pozas.  
Estado reproductivo: no se observa estructuras, por lo que se encuentra en una etapa vegetativa.

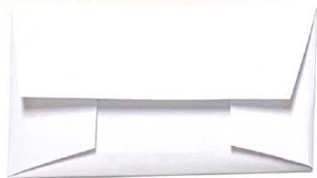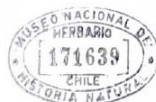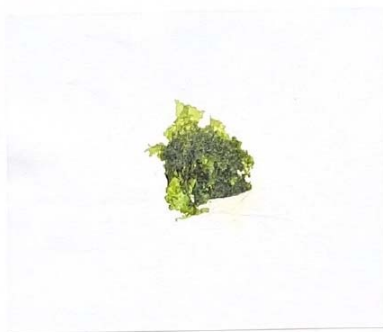

Nombre científico: *Ulva stenophylloides*  
Localidad: Playa Los Tubos, Algarrobo, V Región, Chile.  
Coordenadas 33°21'891" sur 71°40'763" Oeste  
Nombre del colector: Javiera Mutizabal, Alejandra Núñez y Loretto Contreras-Porcia  
Fecha de Colecta: 11/03/2022  
Observaciones: El alga fue encontrada en el cuadrante 25 en el transecto 1, en el sector sur de la playa de los tubos; se caracterizaba por una fronda suave al tacto de color verde claro, sus frondas son de forma variable, no presenta un estipe definido.  
Hábitat: se encuentra principalmente en el intermareal medio bajo.  
Estado reproductivo: no se observa estructuras, por lo que se encuentra en una etapa vegetativa.



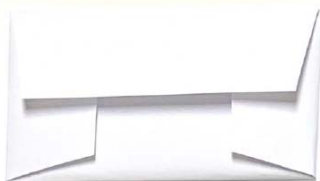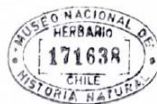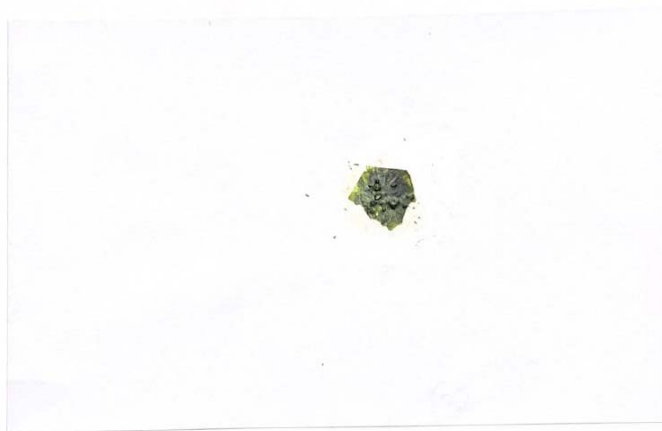

Nombre científico: *Uva stenophyllodes*  
Localidad: Playa Los Tubos, Algarrobo, V Región, Chile.  
Coordenadas 33°21'891" sur 71°40'763" Oeste  
Nombre del colector: Javiera Muizabal, Alejandra Núñez y Loretto Contreras-Porcía  
Fecha de Colecta: 11/03/2022  
Observaciones: El alga fue encontrada en el cuadrante 23 en la transecta 1 en el sector sur de la playa de los tubos; se caracterizaba por una fronda suave al tacto de color verde claro, sus frondas son de forma variable, no presenta un estipe definido.  
Hábitat: se encuentra principalmente en el intermareal medio en pozas.  
Estado reproductivo: no se observa estructuras, por lo que se encuentra en una etapa vegetativa.

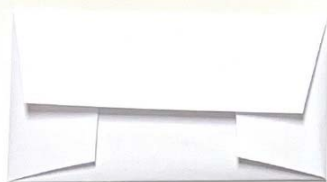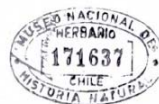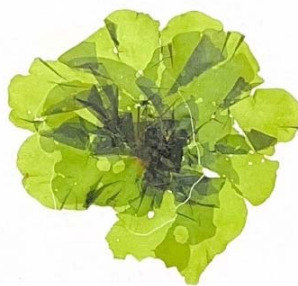

Nombre científico: *Ulva stenophylloides*  
Localidad: Playa Los Tubos, Algarrobo, Chile.  
Coordenadas 33°21'891" sur 71°40'763" Oeste  
Nombre del colector: Florentina Piña, Javiera  
Mutizabal, Loretto Contreras-Porcía  
Fecha de Colecta: 23/08/2021  
Observaciones: El alga fue encontrada en el transecto  
1 cuadrante 9 en el sector sur de la playa de los tubos;  
se caracterizaba por una fronda suave al tacto de color  
verde claro, sus frondas son de forma variable, no  
presenta un estipe definido.  
Habitat: se encuentra principalmente en el intermareal  
alto y medio en pozas.  
Estado reproductivo: no se observa estructuras, por lo  
que se encuentra en una etapa vegetativa.

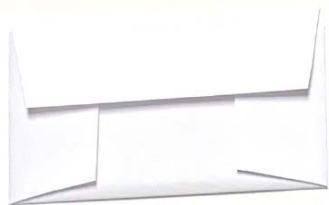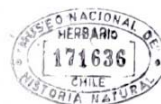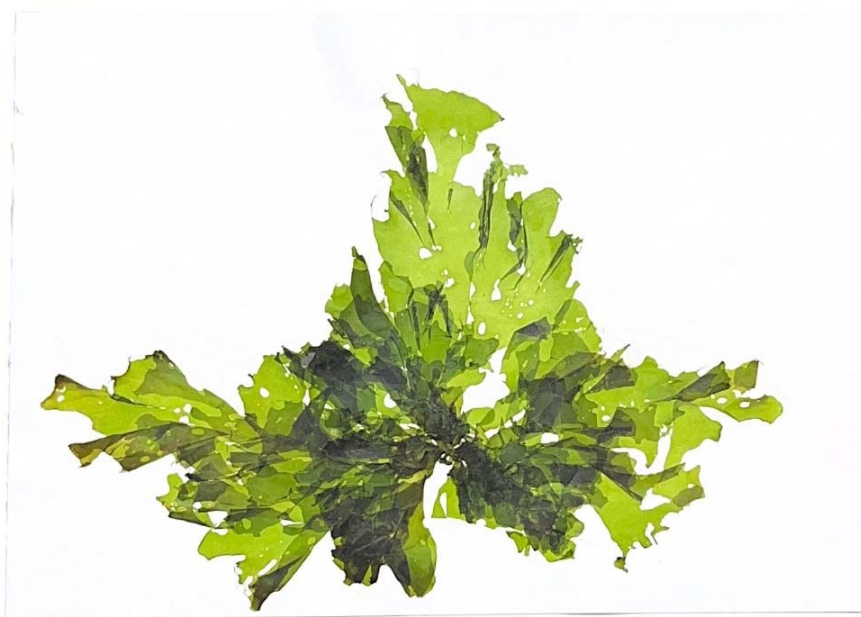

Nombre científico: *Ulva stenophylloides*  
Localidad: Playa Los Tubos, Algarrobo, Chile.  
Coordenadas 33°21' 891" sur 71°40' 763" Oeste  
Nombre del colector: Florentina Piña, Javiera  
Mutizabal, Loretto Contreras-Porcia  
Fecha de Colecta: 23/08/2021  
Observaciones: El alga fue encontrada en el transecto 1  
cuadrante 1 en el sector sur de la playa los Tubos.  
Presenta una lámina de forma foliosa con pequeñas  
perforaciones.  
Hábitat: Intermareal medio, se fijan principalmente  
en zonas donde hay más presencia de arena y no de  
rocas.  
Estado reproductivo no se observó estructuras  
reproductivas, por lo que podría estar en una fase  
vegetativa.
