# Supplementary material for: Morphological and Molecular Identification of Ulva spp. (Ulvophyceae; Chlorophyta) from Algarrobo Bay, Chile: Understanding the Composition of Green Tides
Source: MDPI journal article supplement (doi:10.3390/plants13091258), 2024-04-30
Supplement: s1 [file s1]

**Table S1.** Isolate code, specimen\_voucher numbers and GENBANK accession numbers of *Ulva stenophylloides*, *Ulva uncialis*, *Ulva compressa* and *Ulva aragoensis* from Algarrobo beach, Valparaíso, Chile, sequenced (*ITS1*, and *tufA* markers) during this work.

| Isolate code | Species                     | Specimen_voucher number | GENBANK accession number |             |
|--------------|-----------------------------|-------------------------|--------------------------|-------------|
|              |                             |                         | <i>ITS</i>               | <i>tufA</i> |
| Sample1      | <i>Ulva stenophylloides</i> | SGO171638               | OR514517                 | -           |
| Sample2      | <i>Ulva stenophylloides</i> | -                       | OR514518                 | -           |
| Sample5      | <i>Ulva uncialis</i>        | -                       | OR514519                 | -           |
| Sample7      | <i>Ulva uncialis</i>        | -                       | OR514520                 | -           |
| Sample8      | <i>Ulva uncialis</i>        | -                       | OR514521                 | -           |
| Sample9      | <i>Ulva uncialis</i>        | SGO171642               | OR514522                 | -           |
| Sample10     | <i>Ulva uncialis</i>        | -                       | OR514523                 | .           |
| Sample2E     | <i>Ulva stenophylloides</i> | SGO171636               | OR514524                 | OR526355    |
| Sample2I     | <i>Ulva stenophylloides</i> | SGO171637               | OR514525                 | -           |
| Sample2J     | <i>Ulva stenophylloides</i> | -                       | OR514526                 | OR526358    |
| Sample2XI    | <i>Ulva uncialis</i>        | SGO171645               | OR514527                 | -           |
| Sample2XII   | <i>Ulva uncialis</i>        | -                       | OR514528                 | -           |
| Sample3D     | <i>Ulva stenophylloides</i> | -                       | OR514529                 | -           |
| Sample3E     | <i>Ulva stenophylloides</i> | SGO171639               | OR514530                 | -           |
| Sample3G     | <i>Ulva stenophylloides</i> | -                       | OR514531                 | -           |
| Sample3XI    | <i>Ulva uncialis</i>        | SGO171648               | OR514532                 | -           |
| Sample3XII   | <i>Ulva uncialis</i>        | SGO171644               | OR514533                 | -           |
| Sample4A     | <i>Ulva uncialis</i>        | -                       | OR514534                 | -           |
| Sample4C     | <i>Ulva uncialis</i>        | -                       | OR514535                 | -           |
| Sample4D     | <i>Ulva uncialis</i>        | -                       | OR514536                 | OR526362    |
| Sample4E     | <i>Ulva uncialis</i>        | -                       | OR514537                 | -           |
| Sample4G     | <i>Ulva uncialis</i>        | -                       | OR514538                 | OR526364    |

|               |                             |           |          |          |
|---------------|-----------------------------|-----------|----------|----------|
| Sample4M      | <i>Ulva uncialis</i>        | -         | OR514539 | -        |
| Sample4X      | <i>Ulva uncialis</i>        | -         | OR514540 | -        |
| Sample4XII    | <i>Ulva uncialis</i>        | -         | OR514541 | -        |
| Sample8AM     | <i>Ulva uncialis</i>        | -         | OR514542 | OR526367 |
| Sample100X    | <i>Ulva compressa</i>       | -         | OR514543 | -        |
| Sample100XII  | <i>Ulva compressa</i>       | -         | OR514544 | -        |
| Sample100XIII | <i>Ulva compressa</i>       | SGO171649 | OR514545 | -        |
| Sample100XIV  | <i>Ulva compressa</i>       | -         | OR514546 | -        |
| Sample200X    | <i>Ulva aragoensis</i>      | -         | OR514547 | -        |
| Sample200XI   | <i>Ulva aragoensis</i>      | -         | OR514548 | -        |
| Sample200XII  | <i>Ulva aragoensis</i>      | SGO171650 | OR514549 | -        |
| Sample300XI   | <i>Ulva aragoensis</i>      | -         | OR514550 | -        |
| Sample300XII  | <i>Ulva aragoensis</i>      | SGO171651 | OR514551 | -        |
| Sample300XIV  | <i>Ulva compressa</i>       | -         | OR514552 | -        |
| Sample4AM     | <i>Ulva australis</i>       | SGO171635 | OR514553 | OR526361 |
| SampleFCMM    | <i>Ulva uncialis</i>        | -         | OR514554 | -        |
| Sample6       | <i>Ulva uncialis</i>        | SGO171640 | OR514555 | OR526366 |
| Sample1X      | <i>Ulva uncialis</i>        | SGO171641 | OR514556 | -        |
| Sample2X      | <i>Ulva uncialis</i>        | SGO171643 | OR514557 | -        |
| Sample3X      | <i>Ulva uncialis</i>        | SGO171647 | OR514558 | -        |
| Sample2G      | <i>Ulva stenophylloides</i> | -         | -        | OR526356 |
| Sample2H      | <i>Ulva stenophylloides</i> | -         | -        | OR526357 |
| Sample3H      | <i>Ulva stenophylloides</i> | -         | -        | OR526359 |
| Sample3K      | <i>Ulva stenophylloides</i> | -         | -        | OR526360 |
| Sample4F      | <i>Ulva uncialis</i>        | -         | -        | OR526363 |
| Sample4H      | <i>Ulva uncialis</i>        | -         | -        | OR526365 |
